# Supplementary material
Source: MDPI journal article supplement (https://www.mdpi.com/2297-8739/7/2/26)
Supplement: s1 [file s1]

**Table S1.** ChromaToF-HRT software data processing parameters.

|                             |                                                      |
|-----------------------------|------------------------------------------------------|
| <b>Mass calibration:</b>    | External mass calibration: once every three analyses |
| <b>Peak S/N:</b>            | 10                                                   |
| <b>Peak quality:</b>        | 0.7                                                  |
| <b>Peak confidence:</b>     | 1.5                                                  |
| <b>Peak width:</b>          | Default                                              |
| <b>Intensity threshold:</b> | 0                                                    |
